# Supplementary material for: GATA3 as a Blood-Based RNA Biomarker for Idiopathic Parkinson’s Disease
Source: MDPI journal article supplement (doi:10.3390/ijms241210040), 2023-06-12
Supplement: s1 [file s1]

### Supplementary file-

Table S1. Linear regression analysis in idiopathic Parkinson's disease (iPD) patients to show association between blood GATA3 expression and PD associated clinical variable.

| Clinical variable     | Coefficient | 95% CI           | <i>p</i> Value |
|-----------------------|-------------|------------------|----------------|
| Lymphocyte count      | 0.311       | 0.210 to 0.412   | <0.001         |
| Hoehn and Yahr Stages | -0.108      | -0.169 to -0.048 | <0.001         |
| PDSS                  | 0.153       | 0.037 to 0.269   | 0.010          |
| UPDRS Part I          | -0.150      | -0.274 to -0.026 | 0.018          |
| SCOPA-AUT             | -0.109      | -0.230 to 0.012  | 0.077          |
| UPDRS Part II         | -0.142      | -0.303 to 0.018  | 0.082          |
| REM                   | -0.097      | -0.211 to 0.017  | 0.094          |
| Sniffin' Sticks score | 0.117       | -0.030 to 0.264  | 0.119          |
| UPDRS Part III        | -0.111      | -0.288 to 0.066  | 0.219          |
| Disease duration      | -0.108      | -0.287 to 0.071  | 0.234          |
| BDI                   | -0.059      | -0.176 to 0.057  | 0.316          |
| MoCA                  | 0.048       | -0.053 to 0.150  | 0.350          |
| LEDD                  | -0.079      | -0.258 to 0.100  | 0.386          |
| UPDRS Part IV         | -0.055      | -0.181 to 0.072  | 0.397          |

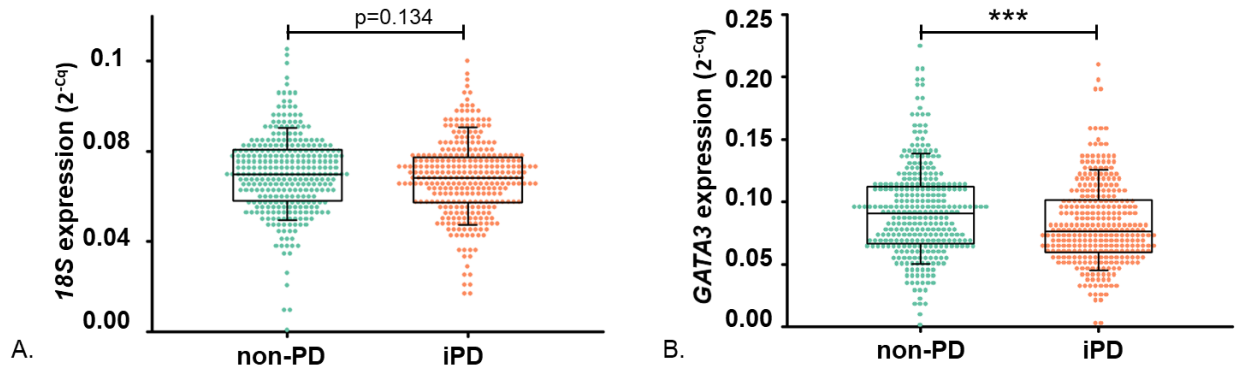

Figure S1. Raw expression levels of 18S and *GATA3*. A) Expression levels of 18S were comparable between non-PD controls and idiopathic Parkinson's disease (iPD) and B) Expression levels of *GATA3* mRNA were downregulated in iPD compared to non-PD controls. \*\*\*  $p \leq 0.001$ ; Mann-Whitney Rank Sum Test.
